# Supplementary material for: Extracellular Vesicles Isolated from Human Induced Pluripotent Stem Cell-Derived Neurons Contain a Transcriptional Network
Source: PubMed Central journal article supplement (PMC7297870; doi:10.1007/s11064-020-03019-w), 2020-05-02

CD9 original immunoblot

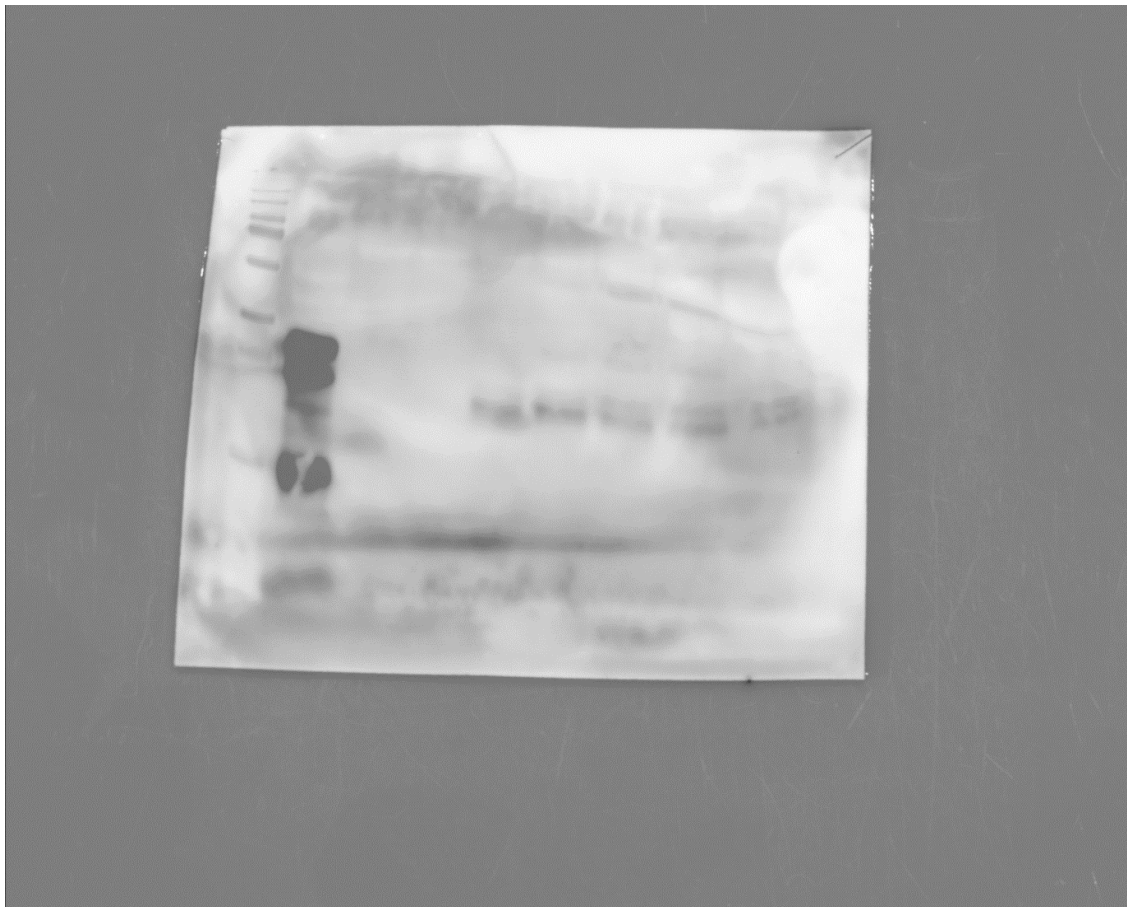

Tsg101 original immunoblot

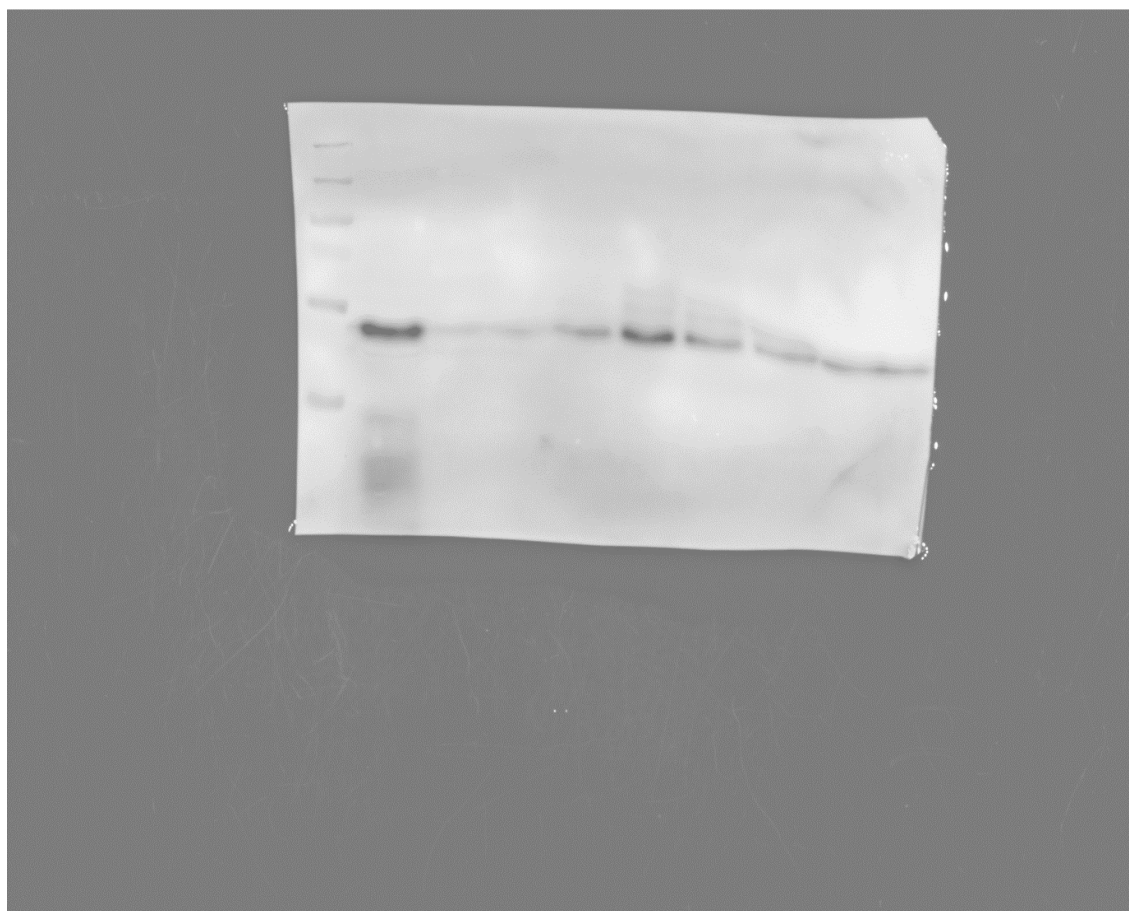

Grp87 original immunoblot

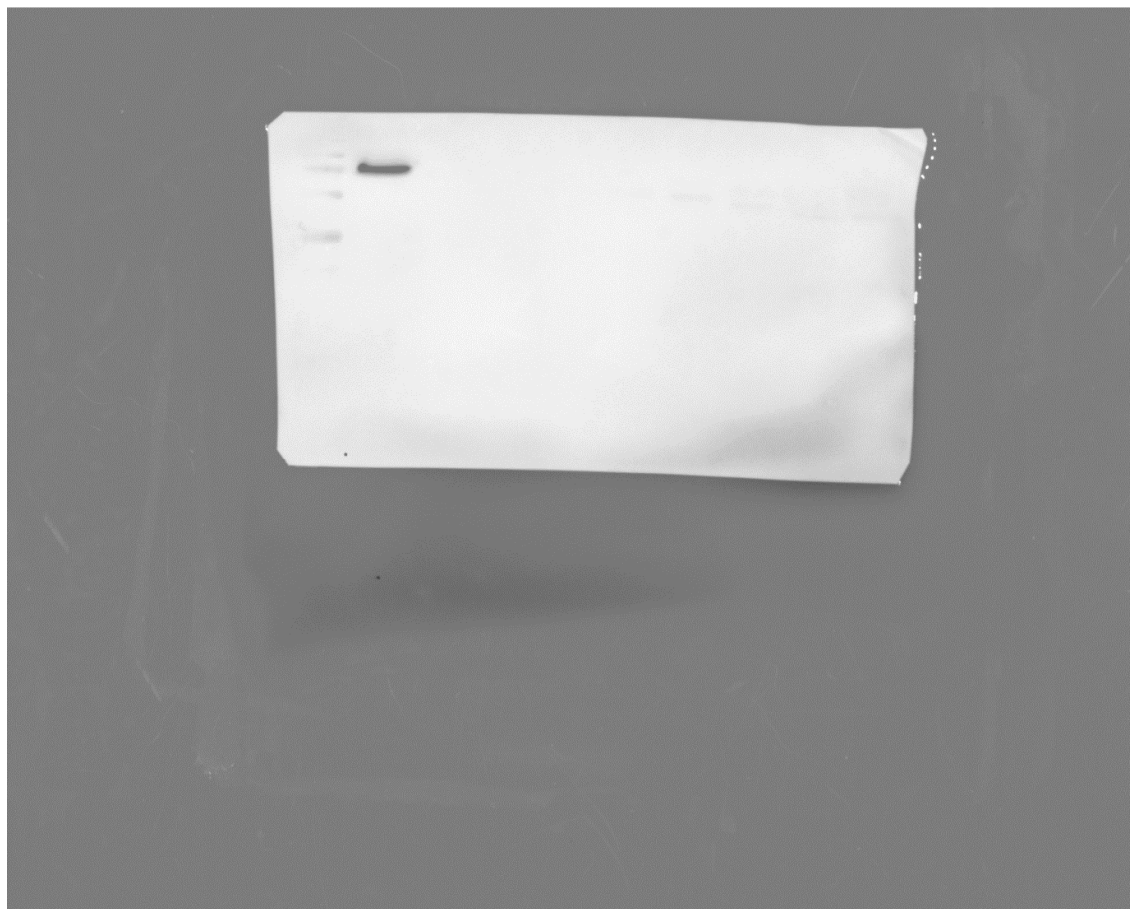

Mitofilin original immunoblot

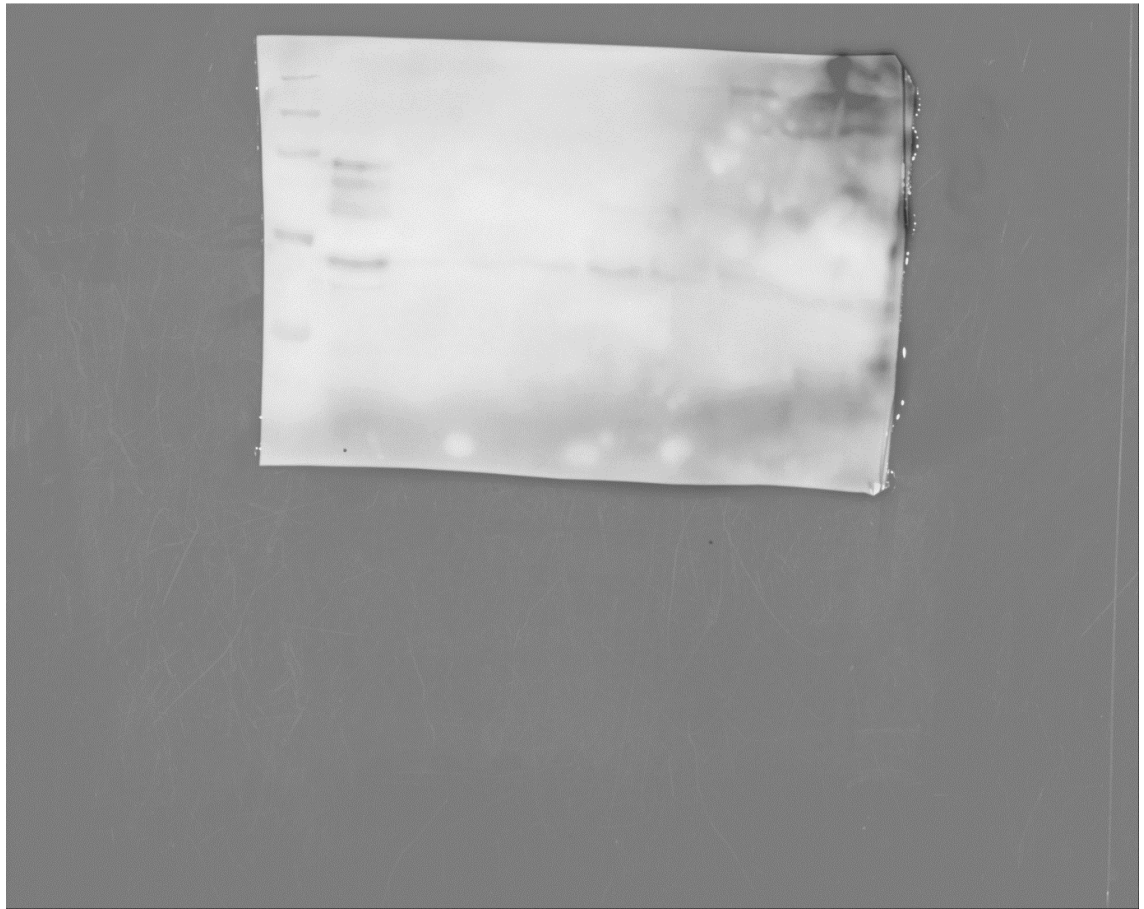

Supplement: 11064_2020_3019_MOESM2_ESM.pdf [file 11064_2020_3019_MOESM2_ESM.pdf]
